# Supplementary material for: CORE-OM as a routine outcome measure for adolescents with emotional disorders: factor structure and psychometric properties
Source: PubMed Central journal article supplement (PMC7439542; doi:10.1186/s40359-020-00459-5), 2020-08-20
Supplement: 40359_2020_459_MOESM1_ESM.pdf [file 40359_2020_459_MOESM1_ESM.pdf]

**Additional File 1.** Descriptive statistics for the 34 CORE-OM items for the non-clinical and clinical sample.

| Item                                                              | Non-clinical sample              |                  |                  |                |                | Clinical sample |     |     |       |       |
|-------------------------------------------------------------------|----------------------------------|------------------|------------------|----------------|----------------|-----------------|-----|-----|-------|-------|
|                                                                   | M <sup>a</sup> (SD) <sup>b</sup> | 50p <sup>c</sup> | IQR <sub>d</sub> | S <sup>e</sup> | K <sup>f</sup> | M (SD)          | 50p | IQR | S     | K     |
| 1 I have felt terribly alone and isolated                         | 0.76 (0.94)                      | 0                | 1                | 1.12           | 0.62           | 1.81 (1.21)     | 2   | 2   | -0.03 | -0.81 |
| 2 I have felt tense, anxious or nervous                           | 1.27 (1.07)                      | 1                | 2                | 0.55           | -0.42          | 2.44 (0.97)     | 3   | 1   | -0.25 | -0.63 |
| 3 I have felt I have someone to turn to for support when needed   | 3.05 (1.13)                      | 3                | 2                | -1.13          | 0.49           | 2.35 (1.20)     | 2   | 2   | -0.19 | -0.91 |
| 4 I have felt O.K. about myself                                   | 2.58 (1.13)                      | 3                | 1                | -0.44          | -0.65          | 1.21 (0.98)     | 1   | 2   | 0.49  | -0.32 |
| 5 I have felt totally lacking in energy and enthusiasm            | 1.64 (1.05)                      | 2                | 1                | 0.18           | -0.52          | 2.73 (1.05)     | 3   | 2   | -0.60 | -0.25 |
| 6 I have been physically violent to others                        | 0.26 (0.61)                      | 0                | 0                | 3.11           | 12.33          | 0.16 (0.51)     | 0   | 0   | 3.80  | 15.45 |
| 7 I have felt able to cope when things go wrong                   | 2.99 (0.96)                      | 3                | 2                | -0.72          | -0.05          | 1.82 (1.04)     | 2   | 1   | 0.29  | -0.17 |
| 8 I have been troubled by aches, pains or other physical problems | 1.30 (1.15)                      | 1                | 2                | 0.59           | -0.53          | 2.01 (1.35)     | 2   | 2   | -0.01 | -1.13 |
| 9 I have thought of hurting myself                                | 0.31 (0.79)                      | 0                | 0                | 2.73           | 6.99           | 1.32 (1.34)     | 1   | 2   | 0.55  | -0.97 |
| 10 Talking to people has felt too much for me                     | 0.74 (1.01)                      | 0                | 1                | 1.32           | 1.01           | 1.70 (1.08)     | 2   | 1   | 0.07  | -0.42 |
| 11 Tension and anxiety have prevented me doing important things   | 0.64 (0.99)                      | 0                | 1                | 1.50           | 1.41           | 1.75 (1.23)     | 2   | 2   | 0.07  | -0.91 |
| 12 I have been happy with the things I have done                  | 2.68 (0.98)                      | 3                | 1                | -0.50          | -0.12          | 1.61 (0.89)     | 2   | 1   | 0.29  | 0.20  |
| 13 I have been disturbed by unwanted thoughts and feelings        | 1.17 (1.16)                      | 1                | 2                | 0.79           | -0.22          | 2.56 (1.12)     | 3   | 1   | -0.43 | -0.60 |
| 14 I have felt like crying                                        | 1.26 (1.25)                      | 1                | 2                | 0.70           | -0.54          | 2.65 (1.11)     | 3   | 1   | -0.77 | 0.07  |
| 15 I have felt panic or terror                                    | 0.65 (0.91)                      | 0                | 1                | 1.37           | 1.29           | 1.68 (1.13)     | 2   | 1   | 0.20  | -0.72 |
| 16 I made plans to end my life                                    | 0.17 (0.55)                      | 0                | 0                | 3.86           | 16.62          | 0.49 (0.89)     | 0   | 1   | 1.82  | 2.22  |
| 17 I have felt overwhelmed by my problems <sup>a</sup>            | 0.80 (1.05)                      | 0                | 1                | 1.14           | 0.33           | 2.37 (1.20)     | 2   | 1   | -0.27 | -0.82 |
| 18 I have difficulty getting to sleep or staying asleep           | 1.22 (1.24)                      | 1                | 2                | 0.71           | -0.56          | 2.36 (1.36)     | 3   | 2   | -0.46 | -0.99 |
| 19 I have felt warmth and affection for someone                   | 2.43 (1.26)                      | 3                | 1                | -0.45          | -0.79          | 2.24 (0.98)     | 2   | 1   | -0.03 | -0.58 |
| 20 My problems have been impossible to put to one side            | 1.12 (1.20)                      | 1                | 2                | 0.87           | -0.27          | 2.34 (1.08)     | 2   | 1   | -0.43 | -0.32 |
| 21 I have been able to do most things I needed to                 | 2.88 (1.08)                      | 3                | 2                | -0.90          | 0.21           | 2.14 (0.96)     | 2   | 2   | 0.02  | -0.32 |
| 22 I have threatened or intimidated another person                | 0.24 (0.54)                      | 0                | 0                | 2.80           | 10.29          | 0.12 (0.47)     | 0   | 0   | 4.13  | 17.16 |
| 23 I have felt despairing or hopeless                             | 0.83 (1.04)                      | 0                | 1                | 1.12           | 0.40           | 2.10 (1.24)     | 2   | 2   | -0.17 | -0.97 |
| 24 I have thought it would be better if I were dead               | 0.38 (0.85)                      | 0                | 0                | 2.48           | 5.76           | 1.36 (1.42)     | 1   | 2   | 0.63  | -0.96 |
| 25 I have felt criticised by other people                         | 1.04 (1.09)                      | 1                | 2                | 0.86           | -0.06          | 1.95 (1.34)     | 2   | 2   | -0.07 | -1.19 |
| 26 I have thought I have no friends                               | 0.50 (0.89)                      | 0                | 1                | 1.97           | 3.51           | 1.44 (1.35)     | 1   | 2   | 0.60  | -0.81 |
| 27 I have felt unhappy                                            | 0.92 (1.09)                      | 1                | 2                | 1.07           | 0.35           | 2.34 (1.28)     | 3   | 2   | -0.40 | -0.93 |
| 28 Unwanted images or memories have been distressing me           | 0.82 (1.09)                      | 0                | 1                | 1.31           | 0.94           | 1.67 (1.34)     | 2   | 3   | 0.26  | -1.08 |
| 29 I have been irritable when with other people                   | 0.88 (0.99)                      | 1                | 1                | 1.06           | 0.63           | 1.79 (1.20)     | 2   | 2   | -0.01 | -0.82 |

|                                                                          |             |   |   |       |       |             |   |   |       |       |
|--------------------------------------------------------------------------|-------------|---|---|-------|-------|-------------|---|---|-------|-------|
| 30 I have thought I am to blame for my problems and difficulties         | 1.25 (1.25) | 1 | 2 | 0.73  | -0.48 | 2.30 (1.23) | 2 | 2 | -0.33 | -0.78 |
| 31 I have felt optimistic about my future <sup>a</sup>                   | 2.38 (1.31) | 3 | 2 | -0.39 | -0.93 | 1.61 (1.08) | 2 | 1 | 0.42  | -0.31 |
| 32 I have achieved the things I wanted to                                | 2.57 (0.98) | 3 | 1 | -0.46 | -0.08 | 1.82 (0.87) | 2 | 1 | 0.03  | 0.16  |
| 33 I have felt humiliated or shamed by other people                      | 0.67 (0.92) | 0 | 1 | 1.43  | 1.70  | 1.01 (1.06) | 1 | 2 | 0.73  | -0.56 |
| 34 I have hurt myself physically or taken dangerous risks with my health | 0.37 (0.85) | 0 | 0 | 2.52  | 6.01  | 0.63 (1.08) | 0 | 1 | 1.56  | 1.30  |

a. M = Mean; b. SD = Standard deviation; c. Median; d. Inter-quartile range; e. Skewness; f. Kurtosis. The numbers in this table have been computed in IBM SPSS, version 26.
